# Supplementary material for: Aluminum Toxicity-Induced Alterations of Leaf Proteome in Two Citrus Species Differing in Aluminum Tolerance
Source: PubMed Central journal article supplement (PMC4964550; doi:10.3390/ijms17071180), 2016-07-21
Supplement: ijms-17-01180-s001.pdf [file ijms-17-01180-s001.pdf]

# Supplementary Materials: Aluminum Toxicity-Induced Alterations of Leaf Proteome in Two Citrus Species Differing in Aluminum Tolerance

Huan Li, Lin-Tong Yang, Yi-Ping Qi, Peng Guo, Yi-Bin Lu and Li-Song Chen

**Table S1.** List of differentially expressed proteins in Al-toxic *Citrus sinensis* leaves. Control and Al-toxic samples were labeled with 119 and 121 tags, respectively.

| Accession                                 | Homology in <i>Arabidopsis thaliana</i> | Proteins                                                                                                                                                 | Fold Change (121/119) |
|-------------------------------------------|-----------------------------------------|----------------------------------------------------------------------------------------------------------------------------------------------------------|-----------------------|
| <b>Energy and carbohydrate metabolism</b> |                                         |                                                                                                                                                          |                       |
| Ciclev10016525m   PACid:20819165          | AT4G05180.1                             | Photosystem II subunit Q-2                                                                                                                               | 2.138                 |
| Ciclev10017247m   PACid:20815638          | AT3G21055.1                             | Photosystem II subunit T                                                                                                                                 | 2.328                 |
| Ciclev10005974m   PACid:20791469          | AT3G22840.1                             | Chlorophyll A-B binding family protein                                                                                                                   | 2.243                 |
| Ciclev10002532m   PACid:20787444          | AT1G54500.1                             | Rubredoxin family protein                                                                                                                                | 122.070               |
| Ciclev10017081m   PACid:20817328          | AT2G27510.1                             | Ferredoxin 3                                                                                                                                             | 2.190                 |
| Ciclev10029499m   PACid:20813098          | AT2G27510.1                             | Ferredoxin 3                                                                                                                                             | 2.689                 |
| Ciclev10031620m   PACid:20804829          | AT2G39730.2                             | Ribulose biphosphate carboxylase/oxygenase activase, chloroplastic                                                                                       | 370.071               |
| Ciclev10005029m   PACid:20791411          | AT1G79530.1                             | Glyceraldehyde-3-phosphate dehydrogenase                                                                                                                 | 2.635                 |
| Ciclev10014974m   PACid:20817138          | AT3G07670.1                             | Rubisco methyltransferase family protein                                                                                                                 | 0.451                 |
| Ciclev10014196m   PACid:20818257          | AT5G11720.1                             | $\alpha$ -glucosidase//Glycosyl hydrolases family 31 protein                                                                                             | 2.086                 |
| Ciclev10017122m   PACid:20815005          | AT3G26720.1                             | Glycosyl hydrolase family 38 protein                                                                                                                     | 2.203                 |
| Ciclev10028301m   PACid:20813445          | AT4G39010.1                             | Endo-1,4- $\beta$ -glucanase//Endoglucanase 24                                                                                                           | 121.841               |
| Ciclev10028656m   PACid:20812272          | AT4G34480.1                             | (1->3)- $\beta$ -glucan endohydrolase 7// $\beta$ -1,3-endoglucanase 7//Glucan endo-1,3- $\beta$ -glucosidase 7//O-Glycosyl hydrolases family 17 protein | 2.260                 |
| Ciclev10005195m   PACid:20790202          | AT3G57240.1                             | (1->3)- $\beta$ -glucan endohydrolase// $\beta$ -1,3-endoglucanase                                                                                       | 2.439                 |
| Ciclev10005316m   PACid:20792235          | AT3G57270.1                             | (1->3)- $\beta$ -glucan endohydrolase// $\beta$ -1,3-endoglucanase                                                                                       | 2.708                 |
| Ciclev10005491m   PACid:20790391          | AT5G24090.1                             | Acidic endochitinase                                                                                                                                     | 3.017                 |
| Ciclev10004369m   PACid:20791173          | AT5G49360.1                             | Arabinofuranosidase// $\beta$ -D-xylosidase 1                                                                                                            | 0.388                 |
| Ciclev10004864m   PACid:20791543          | AT3G48950.1                             | Pectin lyase-like superfamily protein                                                                                                                    | 0.439                 |
| Ciclev10031404m   PACid:20803253          | AT1G22360.1                             | UDP-glucosyl transferase 85A2                                                                                                                            | 171.963               |
| Ciclev10031408m   PACid:20802707          | AT1G22380.1                             | UDP-glucosyl transferase 85A3                                                                                                                            | 40.098                |
| Ciclev10000272m   PACid:20786660          | AT2G36390.1                             | 1,4- $\alpha$ -glucan-branching enzyme//Q-enzyme                                                                                                         | 2.457                 |
| Ciclev10019346m   PACid:20806605          | AT1G32900.1                             | GBSSII-2//Granule-bound starch synthase 1, chloroplastic//amyloplastic//Granule-bound starch synthase I                                                  | 2.211                 |
| Ciclev10015687m   PACid:20818911          | AT1G29050.1                             | Trichome birefringence-like 38                                                                                                                           | 0.420                 |
| Ciclev10004731m   PACid:20790470          | AT5G19220.1                             | ADP glucose pyrophosphorylase large subunit 1                                                                                                            | 0.467                 |
| Ciclev10032014m   PACid:20805824          | AT3G04120.1                             | Glyceraldehyde-3-phosphate dehydrogenase C subunit 1                                                                                                     | 2.262                 |
| Ciclev10019997m   PACid:20811450          | AT5G56350.1                             | Pyruvate kinase family protein                                                                                                                           | 2.481                 |
| Ciclev10011402m   PACid:20797055          | AT3G08590.1                             | Phosphoglycerate mutase, 2,3-bisphosphoglycerate-independent                                                                                             | 2.354                 |
| Ciclev10011989m   PACid:20798577          | AT5G15140.1                             | Aldose 1-epimerase                                                                                                                                       | 16.397                |

Table S1. Cont.

| Accession                                 | Homology in<br><i>Arabidopsis thaliana</i> | Proteins                                                                                                         | Fold<br>Change<br>(121/119) |
|-------------------------------------------|--------------------------------------------|------------------------------------------------------------------------------------------------------------------|-----------------------------|
| <b>Energy and carbohydrate metabolism</b> |                                            |                                                                                                                  |                             |
| Ciclev10022953m   PACid:20808910          | AT3G62810.1                                | Complex 1 family protein/LVR family protein                                                                      | 12.567                      |
| Ciclev10015546m   PACid:20818719          | AT4G22260.1                                | Alternative oxidase family protein                                                                               | 2.043                       |
| Ciclev10021931m   PACid:20811193          | AT4G19540.1                                | IND1(iron-sulfur protein required for NADH dehydrogenase)-like                                                   | 2.474                       |
| Ciclev10021162m   PACid:20807552          | AT5G24400.1                                | NagB/RpiA/CoA transferase-like superfamily protein                                                               | 2.126                       |
| Ciclev10009694m   PACid:20793497          | AT1G18270.3                                | Ketose-bisphosphate aldolase class-II family protein                                                             | 0.459                       |
| Ciclev10010343m   PACid:20793499          | AT5G20830.2                                | Nodulin-100//Sucrose synthase                                                                                    | 0.298                       |
| Ciclev10020692m   PACid:20809157          | AT3G14420.2                                | Aldolase-type TIM barrel family protein                                                                          | 0.495                       |
| Ciclev10018748m   PACid:20811584          | AT1G78580.1                                | Trehalose-6-phosphate synthase                                                                                   | 0.494                       |
| Ciclev10016324m   PACid:20816626          | AT1G28960.1                                | Coenzyme A diphosphatase NUDT15//Nudix hydrolase 15, mitochondrial//Predicted protein/nudix hydrolase homolog 15 | 0.445                       |
| <b>S metabolism</b>                       |                                            |                                                                                                                  |                             |
| Ciclev10004927m   PACid:20791536          | AT3G22890.1                                | ATP sulfurylase 1                                                                                                | 3.166                       |
| Ciclev10032031m   PACid:20803628          | AT3G03630.1                                | Cysteine synthase 26                                                                                             | 9.028                       |
| Ciclev10032680m   PACid:20805511          | AT1G10370.1                                | Glutathione S-transferase family protein                                                                         | 1682.737                    |
| Ciclev10012631m   PACid:20798866          | AT5G02790.1                                | Glutathione S-transferase family protein                                                                         | 3.157                       |
| Ciclev10022212m   PACid:20809459          | AT2G47730.1                                | Glutathione S-transferase F8, chloroplastic                                                                      | 3.548                       |
| Ciclev10030408m   PACid:20812962          | AT2G29420.1                                | Glutathione S-transferase tau 7                                                                                  | 5.701                       |
| Ciclev10030418m   PACid:20812954          | AT2G29420.1                                | Glutathione S-transferase tau 7                                                                                  | 5.328                       |
| Ciclev10022164m   PACid:20810119          | AT1G78380.1                                | Glutathione S-transferase TAU 19                                                                                 | 2.056                       |
| Ciclev10009304m   PACid:20794954          | AT4G31870.1                                | Glutathione peroxidase 7                                                                                         | 2.220                       |
| Ciclev10022130m   PACid:20808338          | AT4G11600.1                                | Glutathione peroxidase 6                                                                                         | 2.542                       |
| Ciclev10000728m   PACid:20785479          | AT5G27380.1                                | Glutathione synthetase 2                                                                                         | 384.080                     |
| Ciclev10008149m   PACid:20793255          | AT4G33030.1                                | UDP-sulfoquinovose synthase, chloroplastic                                                                       | 2.061                       |
| Ciclev10016894m   PACid:20815716          | AT3G54900.1                                | Monothiol glutaredoxin-S14, chloroplastic                                                                        | 22.681                      |
| Ciclev10002859m   PACid:20787371          | AT3G51030.1                                | Thioredoxin H-type 1                                                                                             | 2.264                       |
| Ciclev10002332m   PACid:20785936          | AT1G76020.1                                | Thioredoxin superfamily protein                                                                                  | 2.015                       |
| Ciclev10007750m   PACid:20792997          | AT4G29210.1                                | $\gamma$ -glutamyl transpeptidase 4                                                                              | 0.479                       |
| Ciclev10017254m   PACid:20817743          | AT1G31170.4                                | Sulfiredoxin                                                                                                     | 0.405                       |
| <b>Stress response</b>                    |                                            |                                                                                                                  |                             |
| Ciclev10001726m   PACid:20787677          | AT1G71695.1                                | ATP4a//PRXR6//Peroxidase 12                                                                                      | 3.198                       |
| Ciclev10012554m   PACid:20797449          | AT3G09640.1                                | Ascorbate peroxidase                                                                                             | 2.785                       |
| Ciclev10002765m   PACid:20789304          | AT1G08830.1                                | Superoxide dismutase [Cu-Zn]//copper/zinc superoxide dismutase 1                                                 | 2.641                       |
| Ciclev10032661m   PACid:20804250          | AT3G10920.1                                | Mn/Fe superoxide dismutase//Superoxide dismutase [Mn], mitochondrial                                             | 2.518                       |
| Ciclev10000951m   PACid:20786358          | AT4G35090.1                                | Catalase                                                                                                         | 0.481                       |
| Ciclev10015870m   PACid:20817415          | AT4G21960.1                                | ATP1a//ATP1b//PRXR1                                                                                              | 0.387                       |
| Ciclev10015090m   PACid:20818685          | AT3G27820.1                                | Probable monodehydroascorbate reductase, cytoplasmic isoform 2                                                   | 0.301                       |
| Ciclev10020289m   PACid:20810123          | AT4G10720.1                                | Ankyrin repeat family protein//Ankyrin repeat-containing protein At2g01680                                       | 2.614                       |
| Ciclev10024221m   PACid:20810180          | AT5G54620.1                                | Ankyrin repeat family protein//Ankyrin repeat protein//Ankyrin repeat-containing protein At2g01680               | 2.159                       |
| Ciclev10016314m   PACid:20818806          | AT2G42590.3                                | 14-3-3 protein homolog [ <i>Maackia amurensis</i> ]//14-3-3-like protein D//SGF14D//General regulatory factor 9  | 738.459                     |

Table S1. Cont.

| Accession                        | Homology in <i>Arabidopsis thaliana</i> | Proteins                                                                                                                             | Fold Change (121/119) |
|----------------------------------|-----------------------------------------|--------------------------------------------------------------------------------------------------------------------------------------|-----------------------|
| <b>Stress response</b>           |                                         |                                                                                                                                      |                       |
| Ciclev10007095m   PACid:20790772 | AT3G23400.1                             | Probable plastid-lipid-associated protein 6, chloroplastic                                                                           | 3.571                 |
| Ciclev10015934m   PACid:20819295 | AT4G22240.1                             | Probable plastid-lipid-associated protein 2, chloroplastic                                                                           | 2.171                 |
| Ciclev10008835m   PACid:20793494 | AT3G47860.1                             | Apolipoprotein D//Chloroplastic lipocalin                                                                                            | 2.249                 |
| Ciclev10029251m   PACid:20813153 | AT1G09560.1                             | Germin-like protein 5                                                                                                                | 3.130                 |
| Ciclev10016799m   PACid:20818836 | AT4G03240.1                             | Frataxin, mitochondrial                                                                                                              | 20.281                |
| Ciclev10022174m   PACid:20810231 | AT1G17100.1                             | SOUL heme-binding family protein                                                                                                     | 2.802                 |
| Ciclev10024466m   PACid:20811465 | AT1G17100.1                             | SOUL heme-binding family protein                                                                                                     | 2.676                 |
| Ciclev10022064m   PACid:20808330 | AT1G17100.1                             | SOUL heme-binding family protein                                                                                                     | 2.251                 |
| Ciclev10029029m   PACid:20813663 | AT1G60680.1                             | NAD(P)-linked oxidoreductase superfamily protein//Probable aldo-keto reductase 2                                                     | 18.580                |
| Ciclev10015901m   PACid:20815543 | AT5G19440.1                             | Alcohol dehydrogenase-like protein                                                                                                   | 20.223                |
| Ciclev10023259m   PACid:20809337 | AT3G03080.1                             | Alcohol dehydrogenase, putative//NADP-dependent alkenal double bond reductase P2                                                     | 3959.958              |
| Ciclev10004594m   PACid:20790507 | AT3G66658.2                             | Aldehyde dehydrogenase 22A1                                                                                                          | 0.405                 |
| Ciclev10019095m   PACid:20809601 | AT5G52640.1                             | Heat shock protein 83//Heat shock protein 90.1                                                                                       | 2.511                 |
| Ciclev10029467m   PACid:20813389 | AT3G46230.1                             | 17.4 kDa class I heat shock protein                                                                                                  | 2.472                 |
| Ciclev10007067m   PACid:20790805 | AT4G15802.1                             | Heat shock factor binding protein                                                                                                    | 543.235               |
| Ciclev10025114m   PACid:20801969 | AT1G16030.1                             | Heat shock 70 kDa protein 5//Heat shock protein 70-5//Heat shock protein, putative                                                   | 2.146                 |
| Ciclev10026390m   PACid:20801494 | AT1G52560.1                             | 26.5 kDa heat shock protein, mitochondrial//HSP20-like chaperones superfamily protein//Small heat-shock protein, putative            | 2.994                 |
| Ciclev10024164m   PACid:20808067 | AT1G53280.1                             | Chaperone protein YajL//Class I glutamine amidotransferase-like superfamily protein                                                  | 508.524               |
| Ciclev10021210m   PACid:20811903 | AT1G53280.1                             | Chaperone protein YajL//Class I glutamine amidotransferase-like superfamily protein                                                  | 18.328                |
| Ciclev10029386m   PACid:20812277 | AT2G16600.1                             | Peptidyl-prolyl <i>cis-trans</i> isomerase CYP19-1                                                                                   | 2.267                 |
| Ciclev10010508m   PACid:20794622 | AT1G01470.1                             | Late embryogenesis abundant protein                                                                                                  | 222.637               |
| Ciclev10009203m   PACid:20796146 | AT5G54110.1                             | Membrane-associated mannitol-induced                                                                                                 | 92.662                |
| Ciclev10012028m   PACid:20798669 | AT1G17020.1                             | Protein SRG1//Senescence-related gene 1                                                                                              | 9.830                 |
| Ciclev10029528m   PACid:20813912 | AT3G04720.1                             | Pathogenesis-related 4                                                                                                               | 3.179                 |
| Ciclev10029375m   PACid:20814005 | AT2G21620.1                             | Adenine nucleotide $\alpha$ hydrolases-like superfamily protein                                                                      | 2.092                 |
| Ciclev10029414m   PACid:20814816 | AT3G53990.1                             | Adenine nucleotide $\alpha$ hydrolases-like superfamily protein//Universal stress protein 1//Universal stress protein A-like protein | 2.567                 |
| Ciclev10006096m   PACid:20791940 | AT1G24020.2                             | MLP-like protein 423//Major allergen Pru ar 1//Stress-related protein                                                                | 2.279                 |
| Ciclev10032973m   PACid:20802498 | AT1G24020.1                             | MLP-like protein 423//Major latex-like protein                                                                                       | 0.407                 |
| <b>Low-P-responsive proteins</b> |                                         |                                                                                                                                      |                       |
| Ciclev10026096m   PACid:20800141 | AT1G73010.1                             | Inorganic pyrophosphatase 1//Predicted protein                                                                                       | 26.117                |
| Ciclev10012723m   PACid:20796310 | AT3G53620.1                             | Soluble inorganic pyrophosphatase 4                                                                                                  | 2.770                 |
| Ciclev10016242m   PACid:20815326 | AT2G39780.2                             | Ribonuclease 2                                                                                                                       | 3.253                 |
| Ciclev10016283m   PACid:20815386 | AT1G25230.1                             | Purple acid phosphatase 4                                                                                                            | 2.776                 |
| Ciclev10015905m   PACid:20817929 | AT2G01890.1                             | Purple acid phosphatase 8                                                                                                            | 2.149                 |
| Ciclev10013402m   PACid:20797645 | AT3G52780.1                             | Purple acid phosphatases superfamily protein                                                                                         | 2.821                 |
| Ciclev10030896m   PACid:20803277 | AT1G13900.1                             | Purple acid phosphatases superfamily protein                                                                                         | 2.346                 |
| Ciclev10015568m   PACid:20815289 | AT3G02040.1                             | Glycerophosphodiester phosphodiesterase GDE1                                                                                         | 7.013                 |
| Ciclev10020540m   PACid:20807368 | AT5G08030.1                             | Glycerophosphoryl diester phosphodiesterase//PLC-like phosphodiesterases superfamily protein                                         | 2.366                 |

Table S1. Cont.

| Accession                                | Homology in <i>Arabidopsis thaliana</i> | Proteins                                                                                                                                          | Fold Change (121/119) |
|------------------------------------------|-----------------------------------------|---------------------------------------------------------------------------------------------------------------------------------------------------|-----------------------|
| <b>Low-P-responsive proteins</b>         |                                         |                                                                                                                                                   |                       |
| Ciclev10018719m   PACid:20805954         | AT1G53310.3                             | Phosphoenolpyruvate carboxylase 3                                                                                                                 | 2.706                 |
| Ciclev10012732m   PACid:20798969         | AT1G79790.1                             | Haloacid dehalogenase-like hydrolase (HAD) superfamily protein//Phosphorylated carbohydrates phosphatase TM_1254                                  | 1142.463              |
| Ciclev10032556m   PACid:20804067         | AT2G38740.1                             | Haloacid dehalogenase-like hydrolase domain-containing protein Sgpp                                                                               | 3.182                 |
| Ciclev10016366m   PACid:20815584         | AT5G44730.1                             | Haloacid dehalogenase-like hydrolase (HAD) superfamily protein                                                                                    | 309.403               |
| Ciclev10008400m   PACid:20795268         | AT2G25870.1                             | Haloacid dehalogenase-like hydrolase family protein                                                                                               | 0.415                 |
| <b>Nucleic acid metabolism</b>           |                                         |                                                                                                                                                   |                       |
| Ciclev10009937m   PACid:20796049         | AT5G26170.1                             | Probable WRKY transcription factor 50                                                                                                             | 3.042                 |
| Ciclev10009720m   PACid:20795220         | AT5G11260.1                             | Basic-leucine zipper (bZIP) transcription factor family protein//Protein LONG HYPOCOTYL 5//Transcription factor HY5//bZIP transcription factor 56 | 17.626                |
| Ciclev10002081m   PACid:20786258         | AT3G12480.1                             | Nuclear factor Y, subunit C11                                                                                                                     | 23.136                |
| Ciclev10025390m   PACid:20800887         | AT5G66730.1                             | C2H2-like zinc finger protein                                                                                                                     | 70.035                |
| Ciclev10033000m   PACid:20804271         |                                         | HAP3-like protein                                                                                                                                 | 2.050                 |
| Ciclev10016303m   PACid:20816503         | AT3G23250.1                             | Myb domain protein 15                                                                                                                             | 0.310                 |
| Ciclev10004185m   PACid:20791644         | AT5G49930.1                             | Zinc knuckle (CCHC-type) family protein                                                                                                           | 0.438                 |
| Ciclev10015532m   PACid:20815484         | AT5G07900.1                             | Mitochondrial transcription termination factor family protein                                                                                     | 0.459                 |
| Ciclev10010753m   PACid:20792790         | AT1G15340.1                             | Methyl-CPG-binding domain 11                                                                                                                      | 2.060                 |
| Ciclev10033914m   PACid:20802816         | AT3G12640.1                             | RNA-binding (RRM/RBD/RNP motifs) family protein                                                                                                   | 368.818               |
| Ciclev10025862m   PACid:20801963         | AT2G18510.1                             | RNA-binding (RRM/RBD/RNP motifs) family protein//Splicing factor 3B subunit 4                                                                     | 293.896               |
| Ciclev10014272m   PACid:20817277         | AT3G02010.1                             | Pentatricopeptide repeat (PPR) superfamily protein                                                                                                | 611.788               |
| Ciclev10018370m   PACid:20818993         | AT4G03430.1                             | Putative pre-mRNA splicing factor                                                                                                                 | 2.190                 |
| Ciclev10030532m   PACid:20804921         | AT3G55220.1                             | Spliceosome-associated protein 130                                                                                                                | 0.496                 |
| Ciclev10021761m   PACid:20808316         | AT1G18800.1                             | NAP1-related protein 2                                                                                                                            | 0.493                 |
| Ciclev10004916m   PACid:20791356         | AT3G54470.1                             | Uridine 5'-monophosphate synthase                                                                                                                 | 543.655               |
| Ciclev10007580m   PACid:20793771         | AT5G11350.1                             | DNase I-like superfamily protein                                                                                                                  | 0.466                 |
| <b>Protein and amino acid metabolism</b> |                                         |                                                                                                                                                   |                       |
| Ciclev10004211m   PACid:20790583         | AT5G49030.3                             | tRNA synthetase class I (I, L, M and V) family protein                                                                                            | 0.417                 |
| Ciclev10004807m   PACid:20791740         | AT3G06430.1                             | Tetratricopeptide repeat (TPR)-like superfamily protein                                                                                           | 0.322                 |
| Ciclev10025061m   PACid:20800270         | AT5G08650.1                             | Elongation factor 4 homolog/Ribosomal back-translocase/Small GTP-binding protein/Translation factor GUF1 homolog, chloroplastic                   | 0.489                 |
| Ciclev10006396m   PACid:20789804         | ATCG00800.1                             | Structural constituent of ribosome                                                                                                                | 0.453                 |
| Ciclev10022283m   PACid:20810800         | AT3G49010.1                             | 60S ribosomal protein L13/Protein BBC1 homolog/Breast basic conserved 1                                                                           | 0.361                 |
| Ciclev10013047m   PACid:20799080         | AT3G56910.1                             | Plastid-specific 50S ribosomal protein 5                                                                                                          | 0.348                 |
| Ciclev10013049m   PACid:20798310         | AT2G38140.1                             | Plastid-specific ribosomal protein 4                                                                                                              | 0.319                 |
| Ciclev10009636m   PACid:20793290         | AT3G15190.1                             | Chloroplast 30S ribosomal protein S20, putative                                                                                                   | 0.494                 |
| Ciclev10022870m   PACid:20811532         | AT3G05560.1                             | Ribosomal L22e protein family                                                                                                                     | 0.465                 |
| Ciclev10006136m   PACid:20789692         | AT2G33450.1                             | Ribosomal L28 family                                                                                                                              | 0.298                 |
| Ciclev10009798m   PACid:20796123         | AT2G19730.1                             | Ribosomal L28e protein family                                                                                                                     | 0.470                 |
| Ciclev10026623m   PACid:20801707         | AT5G65220.1                             | Ribosomal L29 family protein                                                                                                                      | 0.384                 |
| Ciclev10033083m   PACid:20804008         | AT2G39390.1                             | Ribosomal L29 family protein                                                                                                                      | 0.169                 |
| Ciclev10016875m   PACid:20816724         | AT5G45775.2                             | Ribosomal L5P family protein                                                                                                                      | 0.473                 |

Table S1. Cont.

| Accession                                | Homology in<br><i>Arabidopsis thaliana</i> | Proteins                                               | Fold<br>Change<br>(121/119) |
|------------------------------------------|--------------------------------------------|--------------------------------------------------------|-----------------------------|
| <b>Protein and amino acid metabolism</b> |                                            |                                                        |                             |
| Ciclev10021696m   PACid:20808755         | AT4G01310.1                                | Ribosomal L5P family protein                           | 0.439                       |
| Ciclev10032705m   PACid:20803904         | AT5G13510.1                                | Ribosomal protein L10 family protein                   | 0.446                       |
| Ciclev10021899m   PACid:20808624         | AT1G78630.1                                | Ribosomal protein L13 family protein                   | 0.396                       |
| Ciclev10023476m   PACid:20812085         | ATCG00780.1                                | Ribosomal protein L14                                  | 0.448                       |
| Ciclev10016274m   PACid:20815504         | AT3G25920.1                                | Ribosomal protein L15                                  | 0.451                       |
| Ciclev10004001m   PACid:20788151         | ATCG00790.1                                | Ribosomal protein L16                                  | 0.429                       |
| Ciclev10032703m   PACid:20802569         | AT1G26910.1                                | Ribosomal protein L16p/L10e family protein             | 0.397                       |
| Ciclev10006182m   PACid:20792369         | AT1G02780.1                                | Ribosomal protein L19e family protein                  | 0.355                       |
| Ciclev10030134m   PACid:20813406         | AT5G22440.1                                | Ribosomal protein L1p/L10e family                      | 0.487                       |
| Ciclev10016308m   PACid:20817308         | AT4G36130.1                                | Ribosomal protein L2 family                            | 0.273                       |
| Ciclev10002401m   PACid:20788696         | AT1G35680.1                                | Ribosomal protein L21                                  | 0.353                       |
| Ciclev10005921m   PACid:20792152         | ATCG00810.1                                | Ribosomal protein L22                                  | 0.393                       |
| Ciclev10023969m   PACid:20810966         | AT3G53020.1                                | Ribosomal protein L24                                  | 0.393                       |
| Ciclev10017015m   PACid:20815733         | AT1G29070.1                                | Ribosomal protein L34                                  | 0.343                       |
| Ciclev10022900m   PACid:20806865         | AT1G26880.1                                | Ribosomal protein L34e superfamily protein             | 0.302                       |
| Ciclev10033093m   PACid:20804391         | AT1G26880.1                                | Ribosomal protein L34e superfamily protein             | 0.295                       |
| Ciclev10013164m   PACid:20798847         | AT1G07070.1                                | Ribosomal protein L35Ae family protein                 | 0.399                       |
| Ciclev10006273m   PACid:20790606         | AT3G53740.2                                | Ribosomal protein L36e family protein                  | 0.382                       |
| Ciclev10011875m   PACid:20799017         | AT3G09630.1                                | Ribosomal protein L4/L1 family                         | 0.456                       |
| Ciclev10020582m   PACid:20810676         | AT3G25520.1                                | Ribosomal protein L5                                   | 0.388                       |
| Ciclev10016107m   PACid:20818376         | AT5G39740.1                                | Ribosomal protein L5 B                                 | 0.412                       |
| Ciclev10009377m   PACid:20794151         | AT1G33140.1                                | Ribosomal protein L6 family                            | 0.483                       |
| Ciclev10016578m   PACid:20816737         | AT1G05190.1                                | Ribosomal protein L6 family                            | 0.459                       |
| Ciclev10032636m   PACid:20805408         | AT1G74050.1                                | Ribosomal protein L6 family protein                    | 0.463                       |
| Ciclev10032494m   PACid:20803323         | AT2G47610.1                                | Ribosomal protein L7Ae/L30e/S12e/Gadd45 family protein | 0.433                       |
| Ciclev10006259m   PACid:20792027         | AT1G77940.1                                | Ribosomal protein L7Ae/L30e/S12e/Gadd45 family protein | 0.346                       |
| Ciclev10029219m   PACid:20813782         | AT3G44890.1                                | Ribosomal protein L9                                   | 0.440                       |
| Ciclev10016825m   PACid:20818990         | AT5G40950.1                                | Ribosomal protein large subunit 27                     | 0.458                       |
| Ciclev10009763m   PACid:20793057         | AT5G23740.1                                | Ribosomal protein S11-beta                             | 0.396                       |
| Ciclev10002692m   PACid:20789374         | AT5G14320.1                                | Ribosomal protein S13/S18 family                       | 0.387                       |
| Ciclev10006145m   PACid:20790323         | AT4G00100.1                                | Ribosomal protein S13A                                 | 0.413                       |
| Ciclev10026679m   PACid:20800350         | AT1G79850.1                                | Ribosomal protein S17                                  | 0.475                       |
| Ciclev10003202m   PACid:20788933         | ATCG00650.1                                | Ribosomal protein S18                                  | 0.463                       |
| Ciclev10002819m   PACid:20786600         | AT3G04920.1                                | Ribosomal protein S24e family protein                  | 0.402                       |
| Ciclev10029630m   PACid:20813886         | AT2G21580.2                                | Ribosomal protein S25 family protein                   | 0.486                       |
| Ciclev10002825m   PACid:20785887         | AT3G56340.1                                | Ribosomal protein S26e family protein                  | 0.464                       |
| Ciclev10009868m   PACid:20794701         | AT5G56670.1                                | Ribosomal protein S30 family protein                   | 0.208                       |
| Ciclev10012508m   PACid:20798906         | AT4G34670.1                                | Ribosomal protein S3Ae                                 | 0.445                       |

Table S1. Cont.

| Accession                                | Homology in<br><i>Arabidopsis thaliana</i> | Proteins                                                                                                            | Fold<br>Change<br>(121/119) |
|------------------------------------------|--------------------------------------------|---------------------------------------------------------------------------------------------------------------------|-----------------------------|
| <b>Protein and amino acid metabolism</b> |                                            |                                                                                                                     |                             |
| Ciclev10032800m   PACid:20804334         | AT5G39850.1                                | Ribosomal protein S4                                                                                                | 0.444                       |
| Ciclev10029508m   PACid:20812895         | AT2G09990.1                                | Ribosomal protein S5 domain 2-like superfamily protein                                                              | 0.497                       |
| Ciclev10006162m   PACid:20790988         | AT2G09990.1                                | Ribosomal protein S5 domain 2-like superfamily protein                                                              | 0.382                       |
| Ciclev10005613m   PACid:20790205         | AT3G57490.1                                | Ribosomal protein S5 family protein                                                                                 | 0.452                       |
| Ciclev10026340m   PACid:20801998         | AT5G10360.1                                | Ribosomal protein S6e                                                                                               | 0.464                       |
| Ciclev10012856m   PACid:20796870         | AT5G16130.1                                | Ribosomal protein S7e family protein                                                                                | 0.478                       |
| Ciclev10009415m   PACid:20792807         | AT5G59240.1                                | Ribosomal protein S8e family protein                                                                                | 0.370                       |
| Ciclev10023063m   PACid:20807474         | AT3G10950.1                                | Zinc-binding ribosomal protein family protein                                                                       | 0.458                       |
| Ciclev10022990m   PACid:20811127         | AT4G14320.1                                | Zinc-binding ribosomal protein family protein                                                                       | 0.441                       |
| Ciclev10026841m   PACid:20799774         | AT3G16080.1                                | Ribosomal protein L37//Zinc-binding ribosomal protein family protein                                                | 0.235                       |
| Ciclev10009628m   PACid:20794614         | AT5G54600.1                                | Translation protein SH3-like family protein                                                                         | 0.492                       |
| Ciclev10026719m   PACid:20802119         | AT3G49910.1                                | Translation protein SH3-like family protein                                                                         | 0.428                       |
| Ciclev10012788m   PACid:20797116         | AT1G57860.1                                | Translation protein SH3-like family protein                                                                         | 0.347                       |
| Ciclev10001454m   PACid:20789331         | AT1G43170.8                                | 60S ribosomal protein L3//ribosomal protein 1                                                                       | 0.424                       |
| Ciclev10001453m   PACid:20788226         | AT1G61580.1                                | 60S ribosomal protein L3-2//R-protein L3 B                                                                          | 2.068                       |
| Ciclev10005170m   PACid:20789963         | AT4G13670.1                                | Plastid transcriptionally active 5                                                                                  | 2.043                       |
| Ciclev10012870m   PACid:20798639         | AT3G12390.1                                | Nascent polypeptide-associated complex (NAC), alpha subunit family protein                                          | 374.508                     |
| Ciclev10022215m   PACid:20807094         | AT3G49470.1                                | Nascent polypeptide-associated complex subunit alpha-like protein 2                                                 | 73.723                      |
| Ciclev10026634m   PACid:20801099         | AT4G37660.1                                | 50S ribosomal protein L7/L12//Ribosomal protein L12/ ATP-dependent Clp protease adaptor protein ClpS family protein | 196.542                     |
| Ciclev10018845m   PACid:20809345         | AT1G56070.1                                | Ribosomal protein S5/Elongation factor G/III/V family protein                                                       | 576.342                     |
| Ciclev10029555m   PACid:20813972         | AT5G02960.1                                | Ribosomal protein S12/S23 family protein                                                                            | 25.756                      |
| Ciclev10009899m   PACid:20793086         | AT5G20160.1                                | Ribosomal protein L7Ae/L30e/S12e/Gadd45 family protein                                                              | 22.210                      |
| Ciclev10022435m   PACid:20810058         | AT5G27850.1                                | Ribosomal protein L18e/L15 superfamily protein                                                                      | 71.594                      |
| Ciclev10003535m   PACid:20787040         | AT1G35340.1                                | ATP-dependent protease La (LON) domain protein                                                                      | 2.960                       |
| Ciclev10015814m   PACid:20818497         | AT2G27420.1                                | Cysteine proteinases                                                                                                | 315.813                     |
| Ciclev10020859m   PACid:20807278         | AT1G02305.1                                | Cysteine proteinases superfamily protein                                                                            | 2.147                       |
| Ciclev10005038m   PACid:20790402         | AT1G03220.1                                | Eukaryotic aspartyl protease family protein                                                                         | 2.260                       |
| Ciclev10001060m   PACid:20785798         | AT1G73300.1                                | Serine carboxypeptidase, putative//Serine carboxypeptidase-like 18                                                  | 2.432                       |
| Ciclev10029139m   PACid:20813954         | AT5G66140.1                                | Proteasome $\alpha$ subunit D2                                                                                      | 1116.926                    |
| Ciclev10026339m   PACid:20801160         | AT5G66140.1                                | Proteasome $\alpha$ subunit D2                                                                                      | 975.112                     |
| Ciclev10014351m   PACid:20817403         | AT2G04160.1                                | Subtilisin-like serine endopeptidase family protein                                                                 | 310.100                     |
| Ciclev10001054m   PACid:20785799         | AT1G47128.1                                | Granulin repeat cysteine protease family protein                                                                    | 2.617                       |
| Ciclev10002346m   PACid:20788131         | AT3G12490.2                                | Cystatin B                                                                                                          | 2.256                       |
| Ciclev10003705m   PACid:20786256         | AT5G47550.1                                | Cystatin/monellin superfamily protein                                                                               | 2.037                       |
| Ciclev10022001m   PACid:20806490         | AT1G17860.1                                | Kunitz family trypsin and protease inhibitor protein                                                                | 3.039                       |
| Ciclev10022156m   PACid:20808320         | AT1G17860.1                                | Kunitz family trypsin and protease inhibitor protein                                                                | 2.537                       |
| Ciclev10022211m   PACid:20810798         | AT1G17860.1                                | Kunitz family trypsin and protease inhibitor protein                                                                | 2.293                       |
| Ciclev10011794m   PACid:20796925         | AT2G24280.1                                | $\alpha/\beta$ -Hydrolases superfamily protein                                                                      | 2.007                       |

Table S1. Cont.

| Accession                                    | Homology in <i>Arabidopsis thaliana</i> | Proteins                                                                                                        | Fold Change (121/119) |
|----------------------------------------------|-----------------------------------------|-----------------------------------------------------------------------------------------------------------------|-----------------------|
| <b>Protein and amino acid metabolism</b>     |                                         |                                                                                                                 |                       |
| Ciclev10021018m   PACid:20812099             | AT4G10790.1                             | UBX domain-containing protein                                                                                   | 346.152               |
| Ciclev10023537m   PACid:20809334             | AT4G17510.1                             | Ubiquitin C-terminal hydrolase 3                                                                                | 597.747               |
| Ciclev10009208m   PACid:20795336             | AT5G25770.3                             | $\alpha/\beta$ -Hydrolases superfamily protein                                                                  | 0.283                 |
| Ciclev10022124m   PACid:20806488             | AT1G17860.1                             | Kunitz family trypsin and protease inhibitor protein                                                            | 0.454                 |
| Ciclev10008097m   PACid:20793654             | AT4G32940.1                             | Gamma vacuolar processing enzyme                                                                                | 0.454                 |
| Ciclev10014528m   PACid:20815760             | AT5G46210.1                             | Cullin4                                                                                                         | 0.498                 |
| Ciclev10032969m   PACid:20804504             | AT2G47110.1                             | Ubiquitin 6                                                                                                     | 0.268                 |
| Ciclev10008698m   PACid:20793182             | AT5G05920.1                             | Deoxyhypusine synthase                                                                                          | 110.347               |
| Ciclev10028599m   PACid:20813645             | AT5G64370.1                             | Beta-alanine synthase//N-carbamoyl-beta-alanine amidohydrolase//Predicted protein                               | 294.686               |
| Ciclev10021002m   PACid:20809681             | AT4G08900.1                             | Arginase                                                                                                        | 2.541                 |
| Ciclev10011621m   PACid:20797657             | AT3G08860.1                             | Alanine-glyoxylate aminotransferase 2 homolog 3, mitochondrial//Alanine-glyoxylate aminotransferase, putative   | 2.110                 |
| Ciclev10019032m   PACid:20806055             | AT4G12290.1                             | Copper amine oxidase family protein                                                                             | 2.846                 |
| Ciclev10015485m   PACid:20818727             | AT2G13360.1                             | Alanine:glyoxylate aminotransferase                                                                             | 0.382                 |
| Ciclev10007310m   PACid:20794460             | AT4G33010.1                             | Glycine decarboxylase P-protein 1                                                                               | 0.393                 |
| Ciclev10033729m   PACid:20804854             | AT1G69800.2                             | Cystathionine $\beta$ -synthase (CBS) protein                                                                   | 0.423                 |
| Ciclev10032361m   PACid:20805672             | AT1G07780.1                             | Phosphoribosylanthranilate isomerase 1                                                                          | 0.227                 |
| Ciclev10027913m   PACid:20814546             | AT2G37040.1                             | Phenylalanine ammonia-lyase 1                                                                                   | 0.325                 |
| Ciclev10001828m   PACid:20788451             | AT1G76730.1                             | Methenyltetrahydrofolate synthase domain-containing protein//NagB/RpiA/CoA transferase-like superfamily protein | 0.486                 |
| <b>Cell wall and cytoskeleton metabolism</b> |                                         |                                                                                                                 |                       |
| Ciclev10021884m   PACid:20807416             | AT4G17030.1                             | Expansin-like B1                                                                                                | 3.008                 |
| Ciclev10033057m   PACid:20802906             | AT5G59890.2                             | Actin-depolymerizing factor 2//Actin depolymerizing factor 4                                                    | 2188.468              |
| Ciclev10011723m   PACid:20796428             | AT5G23860.2                             | Beta-8-tubulin                                                                                                  | 15.113                |
| Ciclev10011719m   PACid:20798687             | AT5G12250.1                             | Tubulin beta-6 chain                                                                                            | 0.383                 |
| Ciclev10028426m   PACid:20814187             | AT1G50010.1                             | Tubulin $\alpha$ -2 chain                                                                                       | 0.433                 |
| <b>Cellular transport</b>                    |                                         |                                                                                                                 |                       |
| Ciclev10013168m   PACid:20798707             | AT3G01390.1                             | V-type proton ATPase subunit G//Vacuolar proton pump subunit G//Vacuolar membrane ATPase 10                     | 540.092               |
| Ciclev10032471m   PACid:20804478             | AT2G40300.1                             | Ferritin 4                                                                                                      | 2.200                 |
| Ciclev10029240m   PACid:20812600             | AT2G16060.1                             | Non-symbiotic hemoglobin 1                                                                                      | 2.113                 |
| Ciclev10006560m   PACid:20791490             | AT5G51720.1                             | CDGSH iron-sulfur domain-containing protein NEET                                                                | 2.146                 |
| Ciclev10012107m   PACid:20798800             | AT2G40060.1                             | Clathrin light chain 2//Clathrin light chain protein                                                            | 2.006                 |
| Ciclev10016438m   PACid:20816862             | AT1G61250.1                             | Secretory carrier-associated membrane protein 3//secretory carrier 3                                            | 9.400                 |
| Ciclev10032366m   PACid:20805747             | AT3G01280.1                             | Voltage dependent anion channel 1                                                                               | 3.454                 |
| Ciclev10006198m   PACid:20791190             | AT1G01490.2                             | Heavy-metal-associated domain-containing protein                                                                | 2.917                 |
| Ciclev10020395m   PACid:20809498             | AT2G36070.1                             | Mitochondrial import inner membrane translocase subunit TIM44-2                                                 | 2.032                 |
| Ciclev10008825m   PACid:20793014             | AT4G30840.1                             | Nucleoporin Nup43//Nup107-160 subcomplex subunit Nup43//Transducin/WD40 repeat-like superfamily protein         | 166.926               |
| Ciclev10007941m   PACid:20794860             | AT2G18710.1                             | Preprotein translocase subunit SCY1, chloroplastic                                                              | 0.241                 |
| Ciclev10014606m   PACid:20818166             | AT1G14830.1                             | Dynamin                                                                                                         | 0.484                 |
| Ciclev10000332m   PACid:20789395             | AT1G76850.1                             | Exocyst complex component 2//Exocyst complex component Sec5//Predicted protein                                  | 0.412                 |

Table S1. Cont.

| Accession                        | Homology in <i>Arabidopsis thaliana</i> | Proteins                                                                                                   | Fold Change (121/119) |
|----------------------------------|-----------------------------------------|------------------------------------------------------------------------------------------------------------|-----------------------|
| <b>Cellular transport</b>        |                                         |                                                                                                            |                       |
| Ciclev10014840m   PACid:20817945 | AT4G25650.1                             | ACD1-like                                                                                                  | 0.464                 |
| Ciclev10007246m   PACid:20793324 | AT3G43300.1                             | HOPM interactor 7                                                                                          | 0.449                 |
| Ciclev10030708m   PACid:20805624 | AT2G35800.1                             | Mitochondrial substrate carrier family protein                                                             | 0.470                 |
| Ciclev10006055m   PACid:20792243 | AT4G14870.1                             | Preprotein translocase subunit SECE1//SecE/SEC61-gamma protein transport protein                           | 0.363                 |
| Ciclev10018709m   PACid:20805894 | AT2G46520.1                             | Cellular apoptosis susceptibility protein homolog//Exportin-2//Importin-alpha re-exporter                  | 0.498                 |
| Ciclev10007348m   PACid:20795660 | AT5G11560.1                             | Catalytic, putative//ER membrane protein complex subunit 1//Catalytics                                     | 0.498                 |
| <b>Lipid metabolism</b>          |                                         |                                                                                                            |                       |
| Ciclev10032510m   PACid:20802930 | AT3G25780.1                             | Allene oxide cyclase 3                                                                                     | 111.562               |
| Ciclev10014204m   PACid:20816226 | AT3G45140.1                             | Lipoxygenase 2                                                                                             | 3.025                 |
| Ciclev10004649m   PACid:20791288 | AT3G16910.1                             | Acetate/butyrate-CoA ligase AAE7, peroxisomal//Acyl-activating enzyme 7                                    | 195.305               |
| Ciclev10022587m   PACid:20810567 | AT3G61200.1                             | Acyl-CoA thioesterase, putative//Thioesterase superfamily protein                                          | 150.409               |
| Ciclev10020242m   PACid:20811380 | AT1G01710.1                             | Acyl-CoA thioesterase family protein                                                                       | 4.523                 |
| Ciclev10019200m   PACid:20807021 | AT4G23850.1                             | Long chain acyl-CoA synthetase 4                                                                           | 0.449                 |
| Ciclev10010427m   PACid:20796029 | AT1G53920.1                             | GDSL esterase/lipase 5                                                                                     | 2.526                 |
| Ciclev10020550m   PACid:20810248 | AT3G60510.1                             | 3-hydroxyisobutyryl-CoA hydrolase-like protein 1, mitochondrial                                            | 61.285                |
| Ciclev10031489m   PACid:20804761 | AT5G17540.1                             | HXXXD-type acyl-transferase family protein                                                                 | 2.148                 |
| Ciclev10025939m   PACid:20800257 | AT4G39330.1                             | Cinnamyl alcohol dehydrogenase 9                                                                           | 0.475                 |
| Ciclev10020721m   PACid:20807101 | AT4G00400.1                             | Glycerol-3-phosphate acyltransferase 8                                                                     | 0.371                 |
| Ciclev10026558m   PACid:20800793 | AT5G48930.1                             | Hydroxycinnamoyl transferase                                                                               | 0.365                 |
| Ciclev10013542m   PACid:20799197 | AT5G54160.1                             | O-methyltransferase 1                                                                                      | 0.383                 |
| Ciclev10008761m   PACid:20795154 | AT4G33110.1                             | Coclaurine N-methyltransferase                                                                             | 0.417                 |
| Ciclev10010749m   PACid:20792814 | AT3G18000.1                             | Phosphoethanolamine N-methyltransferase 1//Phosphoethanolamine N-methyltransferase, putative               | 0.232                 |
| Ciclev10033579m   PACid:20803972 | AT5G19290.1                             | HU-K5//Lysophospholipase-like//Monoacylglycerol lipase//Monoglyceride lipase                               | 0.488                 |
| <b>Signal transduction</b>       |                                         |                                                                                                            |                       |
| Ciclev10031755m   PACid:20803828 | AT1G14000.1                             | VH1-interacting kinase                                                                                     | 2.151                 |
| Ciclev10012334m   PACid:20797162 | AT5G39790.1                             | 5'-AMP-activated protein kinase-related                                                                    | 2.088                 |
| Ciclev10006977m   PACid:20789643 | AT5G52200.1                             | Phosphoprotein phosphatase inhibitors                                                                      | 1700.715              |
| Ciclev10002098m   PACid:20789158 | AT1G34750.1                             | Protein phosphatase 2C family protein                                                                      | 22.049                |
| Ciclev10021603m   PACid:20811358 | AT4G11240.1                             | Serine/threonine-protein phosphatase PPI isozyme 6                                                         | 2.246                 |
| Ciclev10009194m   PACid:20796151 | AT5G06740.1                             | Concanavalin A-like lectin protein kinase family protein                                                   | 0.250                 |
| Ciclev10018681m   PACid:20806123 | AT5G23060.1                             | Calcium sensing receptor                                                                                   | 360.223               |
| Ciclev10017002m   PACid:20819306 | AT5G47710.1                             | Calcium-dependent lipid-binding (CaLB domain) family protein                                               | 52.792                |
| Ciclev10005548m   PACid:20792350 | AT3G16510.1                             | Calcium-dependent lipid-binding (CaLB domain) family protein                                               | 18.237                |
| Ciclev10005575m   PACid:20789955 | AT3G10300.3                             | Calcium-binding EF-hand family protein//Calmodulin-like protein 49//Probable calcium-binding protein CML49 | 7.611                 |
| Ciclev10003554m   PACid:20787567 | AT2G21830.1                             | Cysteine/Histidine-rich C1 domain family protein                                                           | 2.480                 |
| Ciclev10032615m   PACid:20804275 | AT3G07390.1                             | Auxin-induced in root cultures protein 12//Auxin-responsive family protein                                 | 456.371               |
| Ciclev10022378m   PACid:20809005 | AT4G01900.1                             | GLNB1 homolog//Nitrogen regulatory protein P-II homolog//Protein PII-like                                  | 3.131                 |
| Ciclev10000962m   PACid:20788421 | AT5G63910.1                             | Farnesylcysteine lyase                                                                                     | 143.231               |
| Ciclev10021008m   PACid:20809776 | AT3G59380.1                             | Farnesyltransferase A                                                                                      | 0.374                 |



Table S1. Cont.

| Accession                        | Homology in<br><i>Arabidopsis thaliana</i> | Proteins                                                                                                         | Fold<br>Change<br>(121/119) |
|----------------------------------|--------------------------------------------|------------------------------------------------------------------------------------------------------------------|-----------------------------|
| <b>Others</b>                    |                                            |                                                                                                                  |                             |
| Ciclev10002486m   PACid:20787718 | AT4G31950.1                                | Cytochrome P450                                                                                                  | 0.226                       |
| Ciclev10007096m   PACid:20791221 | AT1G64940.1                                | Cytochrome P450, family 87, subfamily A, polypeptide 6                                                           | 0.467                       |
| Ciclev10004785m   PACid:20790316 | AT3G26300.1                                | Cytochrome P450, family 71, subfamily B, polypeptide 34                                                          | 0.239                       |
| Ciclev10000866m   PACid:20786710 | AT3G26300.1                                | Cytochrome P450, family 71, subfamily B, polypeptide 34                                                          | 0.403                       |
| Ciclev10031280m   PACid:20805703 | AT3G26300.1                                | Cytochrome P450, family 71, subfamily B, polypeptide 34                                                          | 0.299                       |
| Ciclev10017346m   PACid:20815057 | AT5G04750.1                                | F1F0-ATPase inhibitor protein, putative                                                                          | 2.385                       |
| Ciclev10005457m   PACid:20791540 | AT5G24020.1                                | Septum site-determining protein (MIND)                                                                           | 9.392                       |
| Ciclev10021578m   PACid:20810267 | AT1G53520.1                                | Chalcone-flavonone isomerase 2                                                                                   | 17.473                      |
| Ciclev10001946m   PACid:20787842 | AT1G75280.1                                | Isoflavone reductase homolog P3                                                                                  | 0.401                       |
| Ciclev10008386m   PACid:20794913 | AT5G53860.2                                | Embryo defective 2737                                                                                            | 12.485                      |
| Ciclev10012793m   PACid:20797650 | AT2G04690.1                                | Pyridoxamine 5'-phosphate oxidase family protein                                                                 | 2.225                       |
| Ciclev10031003m   PACid:20805689 | AT4G19170.1                                | Probable carotenoid cleavage dioxygenase 4, chloroplastic                                                        | 0.315                       |
| Ciclev10000425m   PACid:20787673 | AT1G21680.1                                | DPP6 N-terminal domain-like protein                                                                              | 4.505                       |
| Ciclev10005724m   PACid:20790262 | AT3G23600.1                                | $\alpha/\beta$ -Hydrolases superfamily protein                                                                   | 2.136                       |
| Ciclev10015803m   PACid:20818801 | AT2G36290.1                                | $\alpha/\beta$ -Hydrolases superfamily protein                                                                   | 0.405                       |
| Ciclev10014035m   PACid:20817344 | AT5G47690.3                                | Uncharacterized binding protein                                                                                  | 0.427                       |
| Ciclev10016821m   PACid:20815954 | AT5G14030.1                                | Translocon-associated protein beta (TRAPB) family protein                                                        | 15.251                      |
| Ciclev10026171m   PACid:20801938 | AT4G36850.1                                | PQ-loop repeat family protein/transmembrane family protein                                                       | 2.084                       |
| Ciclev10016230m   PACid:20818084 | AT4G21470.1                                | Bifunctional riboflavin kinase/FMN phosphatase                                                                   | 2.259                       |
| Ciclev10008512m   PACid:20793764 | AT1G04970.1                                | Lipid-binding serum glycoprotein family protein                                                                  | 2.080                       |
| Ciclev10001991m   PACid:20787158 | AT3G04830.1                                | Protein prenyltransferase superfamily protein                                                                    | 0.473                       |
| Ciclev10020109m   PACid:20808858 | AT5G50150.1                                | Protein of Unknown Function (DUF239)                                                                             | 2.983                       |
| Ciclev10026423m   PACid:20799876 | AT1G15860.1                                | DCN1-like protein 4//DCUN1 domain-containing protein 4//Defective in cullin neddylation protein 1-like protein 4 | 0.499                       |
| Ciclev10016630m   PACid:20817048 | AT3G20790.1                                | NAD(P)-binding Rossmann-fold superfamily protein                                                                 | 0.393                       |

**Table S2.** List of differentially expressed proteins in Al-toxic *Citrus grandis* leaves. Control and Al-toxic samples were labeled with 114 and 117 tags, respectively.

| Accession                                 | Homology in<br><i>Arabidopsis thaliana</i> | Proteins                                                                                                                         | Fold Change<br>(117/114) |
|-------------------------------------------|--------------------------------------------|----------------------------------------------------------------------------------------------------------------------------------|--------------------------|
| <b>Energy and carbohydrate metabolism</b> |                                            |                                                                                                                                  |                          |
| Ciclev10016116m PACid:20816432            | AT3G26710.1                                | Cofactor assembly of complex C                                                                                                   | 2.072                    |
| <b>S metabolism</b>                       |                                            |                                                                                                                                  |                          |
| Ciclev10002119m PACid:20786689            | AT2G47730.1                                | Glutathione S-transferase $\phi$ 8                                                                                               | 0.431                    |
| <b>Stress response</b>                    |                                            |                                                                                                                                  |                          |
| Ciclev10009502m PACid:20793097            | AT2G24440.1                                | Selenium binding                                                                                                                 | 0.457                    |
| <b>Low-P-responsive proteins</b>          |                                            |                                                                                                                                  |                          |
| Ciclev10026096m PACid:20800141            | AT1G73010.1                                | Inorganic pyrophosphatase 1//Predicted protein                                                                                   | 2.808                    |
| Ciclev10015568m PACid:20815289            | AT3G02040.1                                | Glycerophosphodiester phosphodiesterase GDE1                                                                                     | 2.407                    |
| <b>Nucleic acid metabolism</b>            |                                            |                                                                                                                                  |                          |
| Ciclev10014026m PACid:20818243            | AT3G01460.1                                | Methyl-CPG-binding domain 9                                                                                                      | 4.615                    |
| Ciclev10031009m PACid:20805801            | AT3G48710.1                                | DEK domain-containing chromatin associated protein                                                                               | 0.422                    |
| <b>Protein and amino acid metabolism</b>  |                                            |                                                                                                                                  |                          |
| Ciclev10004119m PACid:20790317            | AT1G65810.1                                | P-loop containing nucleoside triphosphate hydrolases superfamily protein                                                         | 0.441                    |
| Ciclev10029619m PACid:20813697            | AT3G44590.1                                | 60S acidic ribosomal protein family                                                                                              | 0.412                    |
| Ciclev10007222m PACid:20793486            | AT1G55860.2                                | Ubiquitin-protein ligase 1                                                                                                       | 2.416                    |
| <b>Cellular transport</b>                 |                                            |                                                                                                                                  |                          |
| Ciclev10025542m PACid:20801125            | AT1G80310.1                                | Molybdate transporter 2//Sulfate transporter like protein 5.1//Sulfate transporter, putative//Sulfate transmembrane transporters | 2.623                    |
| Ciclev10005024m PACid:20791376            | AT1G05370.1                                | Sec14p-like phosphatidylinositol transfer family protein                                                                         | 0.282                    |
| <b>Signal transduction</b>                |                                            |                                                                                                                                  |                          |
| Ciclev10027740m PACid:20813291            | AT3G45780.1                                | Non-phototropic hypocotyl protein 1//Root phototropism protein 1                                                                 | 0.456                    |
| Ciclev10009194m PACid:20796151            | AT5G06740.1                                | Concanavalin A-like lectin protein kinase family protein                                                                         | 0.439                    |
| <b>Others</b>                             |                                            |                                                                                                                                  |                          |
| Ciclev10008649m PACid:20793993            | AT4G27520.1                                | Early nodulin-like protein 2                                                                                                     | 0.460                    |
| Ciclev10009420m PACid:20795288            | AT3G20570.1                                | Early nodulin-like protein 9                                                                                                     | 0.325                    |
| Ciclev10032528m PACid:20805031            | AT3G55605.1                                | Mitochondrial glycoprotein family protein                                                                                        | 0.468                    |

**Table S3.** Specific primer pairs used for qRT-PCR expression analysis.

| Accession                      | Proteins                                                      | Forward Primers (5'→3') | Reverse Primers (5'→3')  |
|--------------------------------|---------------------------------------------------------------|-------------------------|--------------------------|
| Ciclev10015568m PACid:20815289 | Glycerophosphodiester phosphodiesterase GDE1                  | AATCGGCGTCGTTTAG        | GGGATATTTAGCGGAAGA       |
| Ciclev10025542m PACid:20801125 | Molybdate transporter 2                                       | CTCCTCGCCCTCACAG        | GGGTATTGCCGACAGA         |
| Ciclev10002119m PACid:20786689 | Glutathione S-transferase phi 8                               | TGGCAACTCCAGTAAAA       | ACAAACATAGCGGCATA        |
| Ciclev10009420m PACid:20795288 | Early nodulin-like protein 9                                  | GCCAGCAAATGGAGTA        | CACGAGGATGAGGATAAT       |
| Ciclev10008649m PACid:20793993 | Early nodulin-like protein 2                                  | AACTGGATTCCGGTGA        | GGAGACTTAGGAGACGG        |
| Ciclev10004927m PACid:20791536 | ATP sulfurylase 1                                             | TGCTCCTCCCTCACA         | ACTTCCAAAGCCAATGAGACT    |
| Ciclev10000272m PACid:20786660 | 1,4- $\alpha$ -glucan-branching enzyme//Q-enzyme              | GGATGGAGGACGAGACAG      | GACAACAATAAGGAATACGAGGA  |
| Ciclev10019346m PACid:20806605 | Granule-bound starch synthase 1, chloroplastic                | GGAACCCCTTGACTGA        | CGGACGAATGAATGTGGGT      |
| Ciclev10018845m PACid:20809345 | Ribosomal protein S5/Elongation factor G/III/V family protein | GCTGCCCTTCGTACTACT      | TCTCCTCACTCAATCCCAACT    |
| Ciclev10008097m PACid:20793654 | Gamma vacuolar processing enzyme                              | GCTCCAGCAACCAATC        | GGTTTATGTTGGAGGAGTAGGAT  |
| Ciclev10001726m PACid:20787677 | ATP4a//PRXR6//Peroxidase 12                                   | CCCAGTAGCGAAAGGT        | GAGGGACTAAAGGACCGACA     |
| Ciclev10022164m PACid:20810119 | Glutathione S-transferase $\tau$ 19                           | TTACTTTCGGCGTGTT        | ACCAGAAGCCAGCAACAAT      |
| Ciclev10028656m PACid:20812272 | (1- $\rightarrow$ 3)- $\beta$ -glucan endohydrolase 7         | CATCCGCCAAGACACTAT      | CCGCACAAATGATTCCAGT      |
| Ciclev10000951m PACid:20786358 | Catalase                                                      | TTTTCTGCTTCCTCC         | CAAGAAGCCCAAGGAAGC       |
| Ciclev10007941m PACid:20794860 | Preprotein translocase subunit SCY1                           | TCTCCAGACTCAGAAAC       | TGCAAGTGGCTGAACAGAA      |
| Ciclev10010749m PACid:20792814 | Phosphoethanolamine N-methyltransferase 1                     | TGGCAGAAAGGATGGT        | AGGGCTATAATGGGCAGTG      |
| Ciclev10006055m PACid:20792243 | Preprotein translocase subunit SECE1                          | AAAGCCGCCACCTGTA        | CAGATAGCCAAGAAGAGGAGC    |
| Ciclev10015870m PACid:20817415 | ATP1a/ATP1b//PRXR1                                            | CCTTTAGTGAGTGAAGAGTAG   | GGACTACCGTAATAGTAAAGTCGC |
| Ciclev10027913m PACid:20814546 | Phenylalanine ammonia-lyase 1                                 | ACGGAACAGGAGTGGG        | CCGTAACCATTCCCTCCATC     |
| Ciclev10022212m PACid:20809459 | Glutathione S-transferase F8, chloroplastic                   | CACGGTTCTGTTTTCTCA      | TTGGGGAGCAGGTTGGA        |
| GU911361.1                     | Actin                                                         | AGAACTATGAACTGCCTGATGGC | GCTTGGAGCAAGTCTGTGATT    |

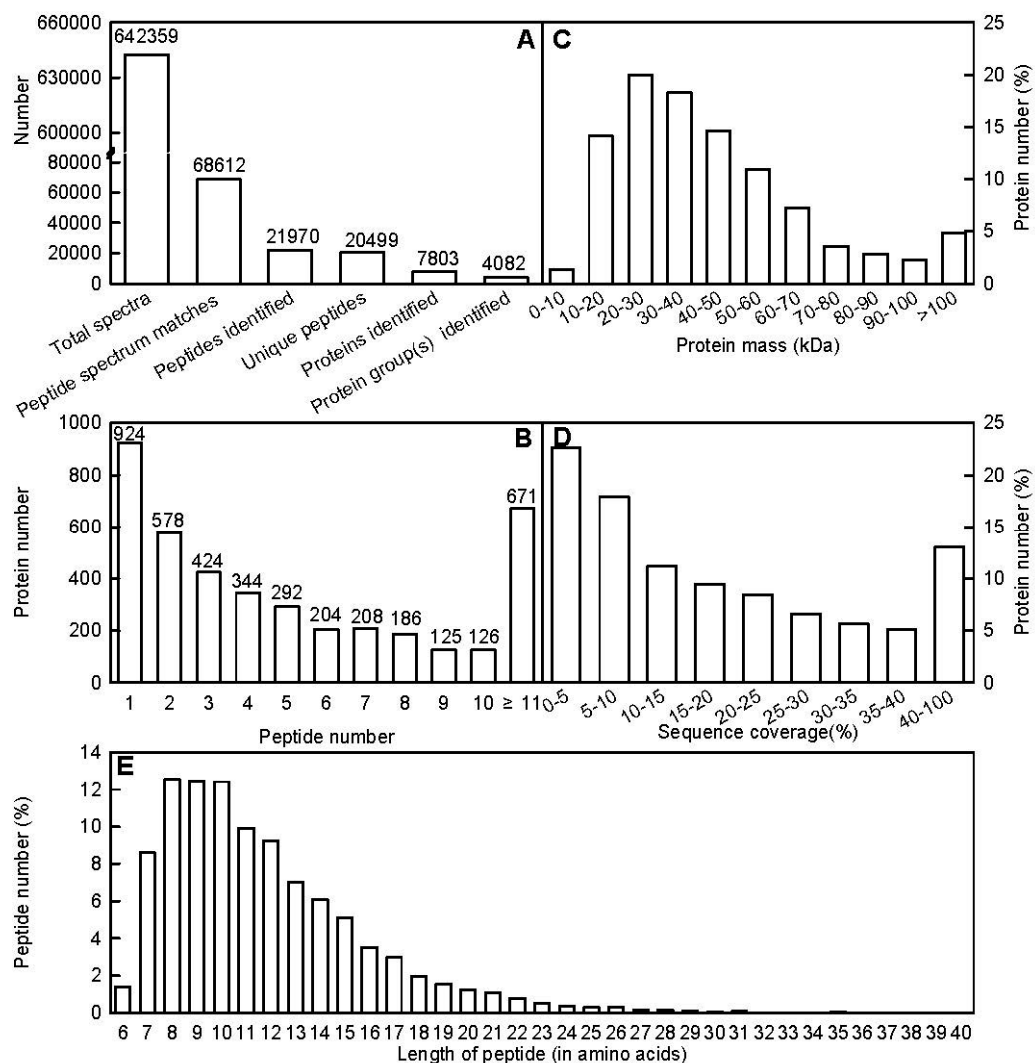

**Figure S1.** Spectra, peptides and proteins identified from iTRAQ proteomics (A); number of peptides that match to proteins (B); protein mass distribution (C); distribution of protein sequence coverage (D); and distribution of peptide length (E) in *C. sinensis* leaves.

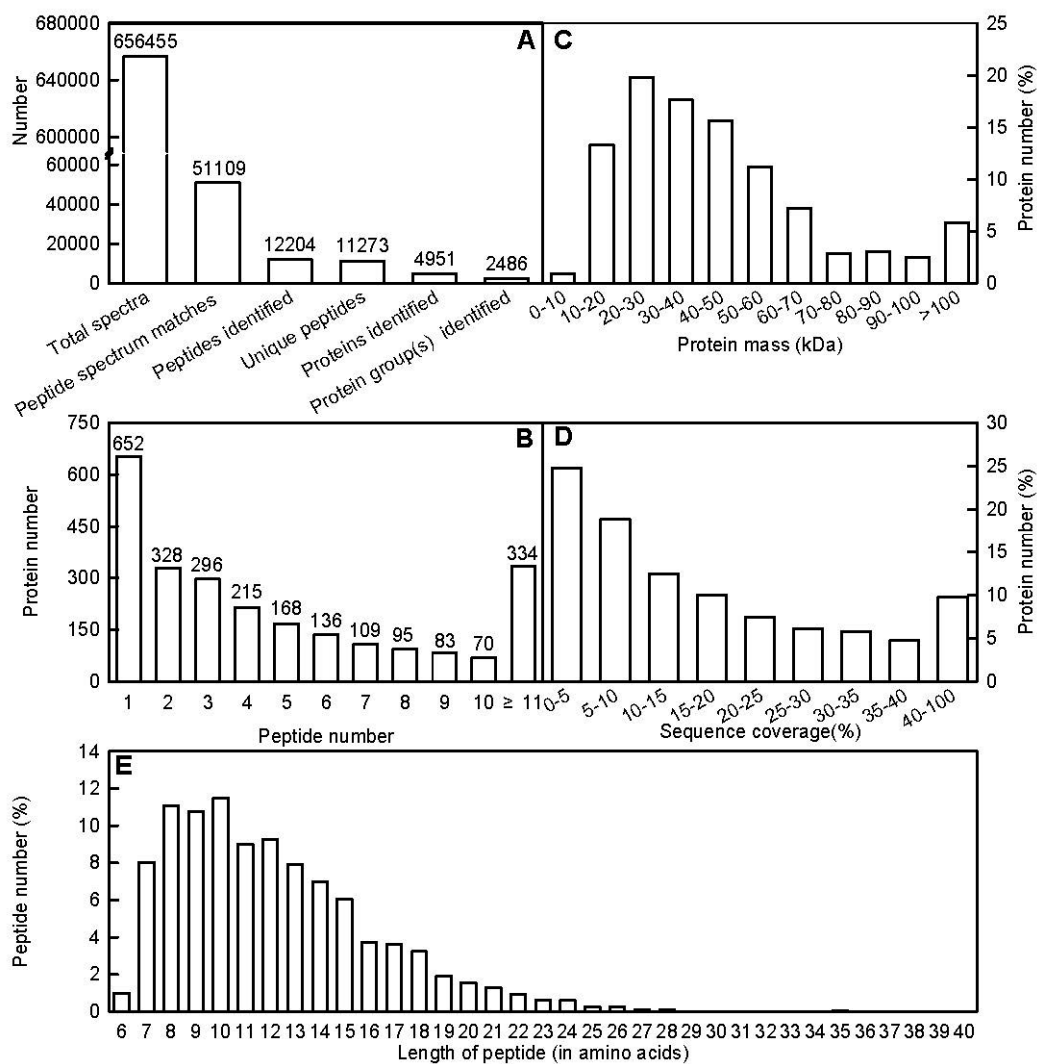

**Figure S2.** Spectra, peptides and proteins identified from iTRAQ proteomics (A); number of peptides that match to proteins (B); protein mass distribution (C); distribution of protein sequence coverage (D); and distribution of peptide length (E) in *C. grandis* leaves.

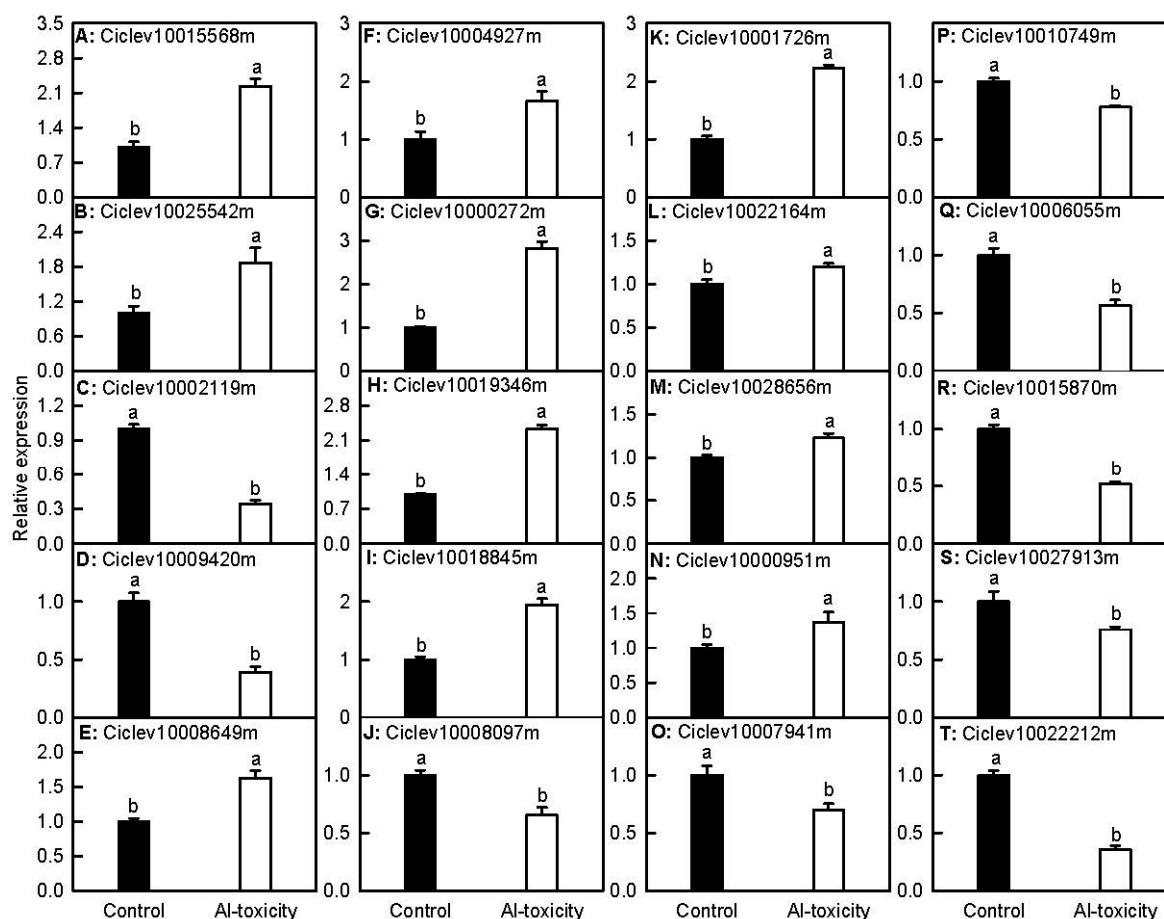

**Figure S3.** Relative expression levels of genes for differentially abundant proteins from *C. grandis* (A–E) and *C. sinensis* (F–T) leaves. qRT-PCR was run in three biological replicates with two technical replicates. For the normalization of gene, citrus *actin* (GU911361.1) was used as an internal standard and the sample from control plants was used as reference sample, which was set to 1. Bars represent means  $\pm$  standard error. Significant tests between means were carried out by unpaired *t*-test. Different letters above the bars indicate a significant difference at  $p < 0.05$ .

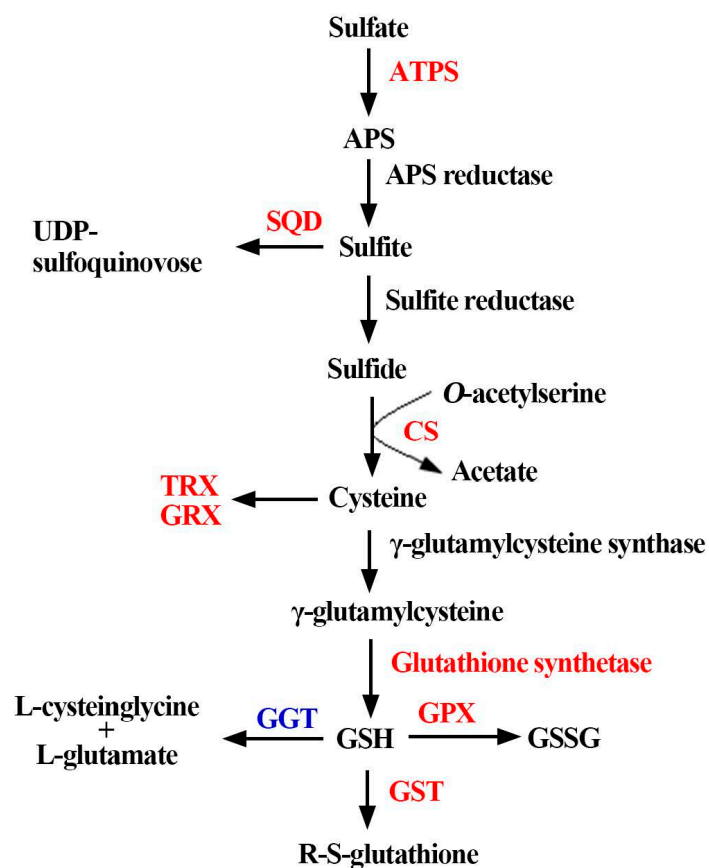

**Figure S4.** Al-induced alterations of S metabolism in *C. sinensis* leaves. Proteins with increased (decreased) abundances were highlighted in red (blue). APS: adenosine phosphosulphate; GGT: gamma-glutamyl transpeptidase; GST: glutathione S-transferase; SQD: UDP-sulfoquinovose synthase.
